# Supplementary material for: Total and Metabolically Active Microbial Community of Aerobic Granular Sludge Systems Operated in Sequential Batch Reactors: Effect of Pharmaceutical Compounds
Source: MDPI journal article supplement (doi:10.3390/toxics9050093), 2021-04-23
Supplement: s1 [file s1]

# Supplementary Materials: Total and Metabolically Active Microbial Community of Aerobic Granular Sludge Systems Operated in Sequential Batch Reactors: Effect of Pharmaceutical Compounds

Barbara Muñoz-Palazon, Aurora Rosa-Masegosa, Miguel Hurtado-Martinez, Alejandro Rodriguez-Sanchez, Ramiro Vilchez-Vargas, Alejandro Gonzalez-Martinez, Jesus Gonzalez Lopez

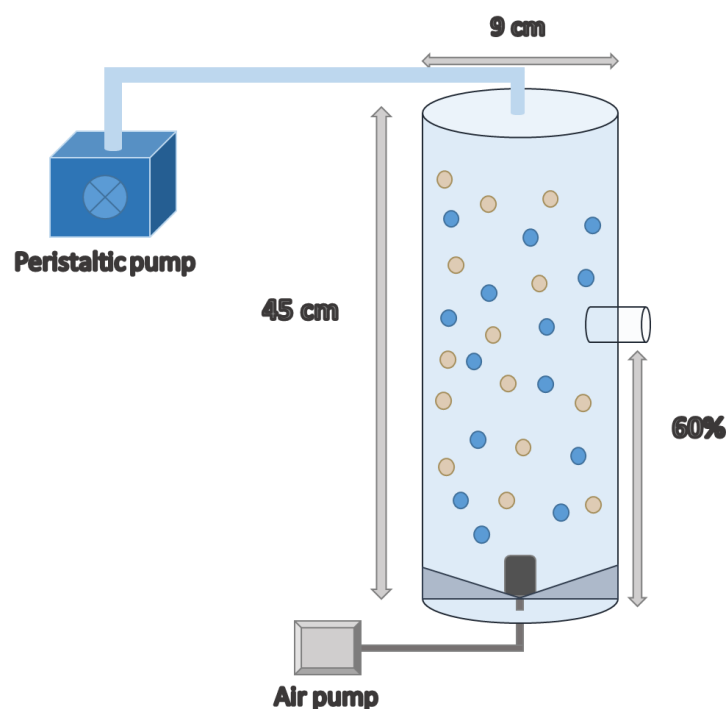

Figure S1. Configuration and design of AGS systems.

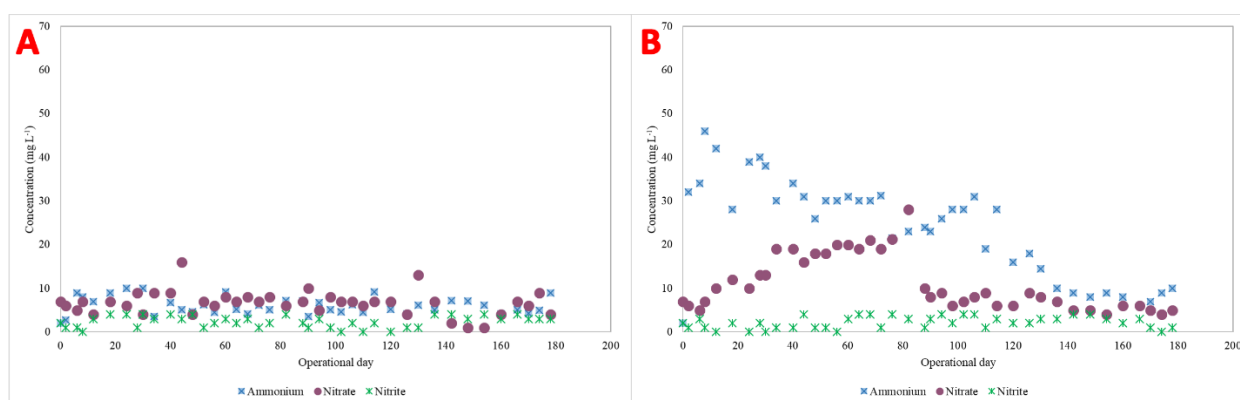

Figure S2. Ammonium, nitrate and nitrite concentration in the effluent in control bioreactor (A) and pharmaceutical bioreactor (B).

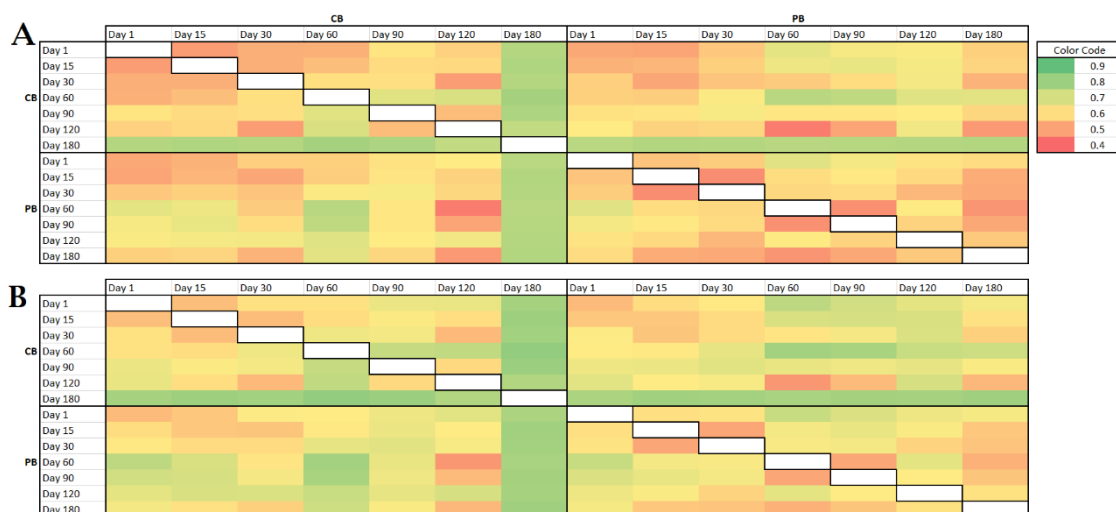

**Figure S3.**  $\beta$ -diversity analyses by Whittaker indices (A: DNA pair of samples; B: RNA pair of samples).

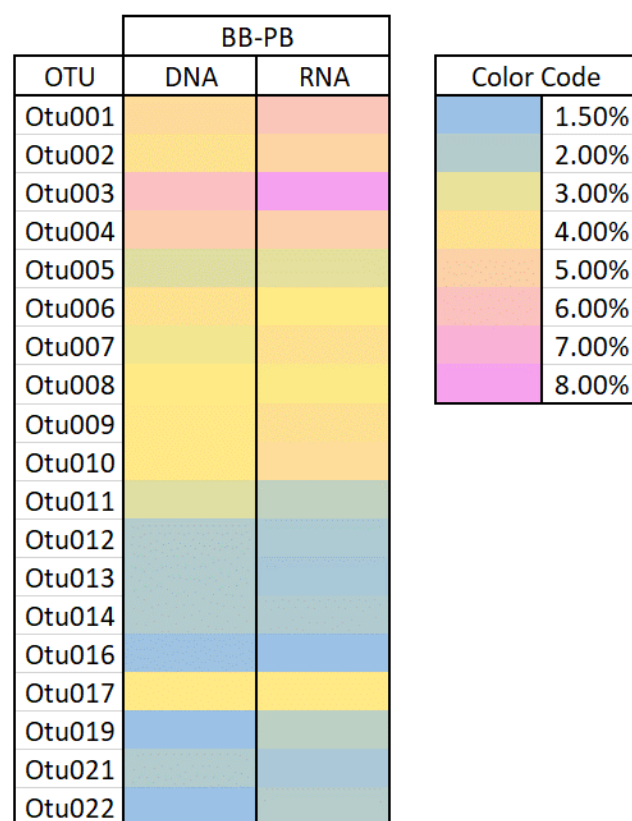

**Figure S4.** SIMPER analysis of the most contribute OTU to dissimilarity between control reactor and reactor amended with pharmaceutical compounds.

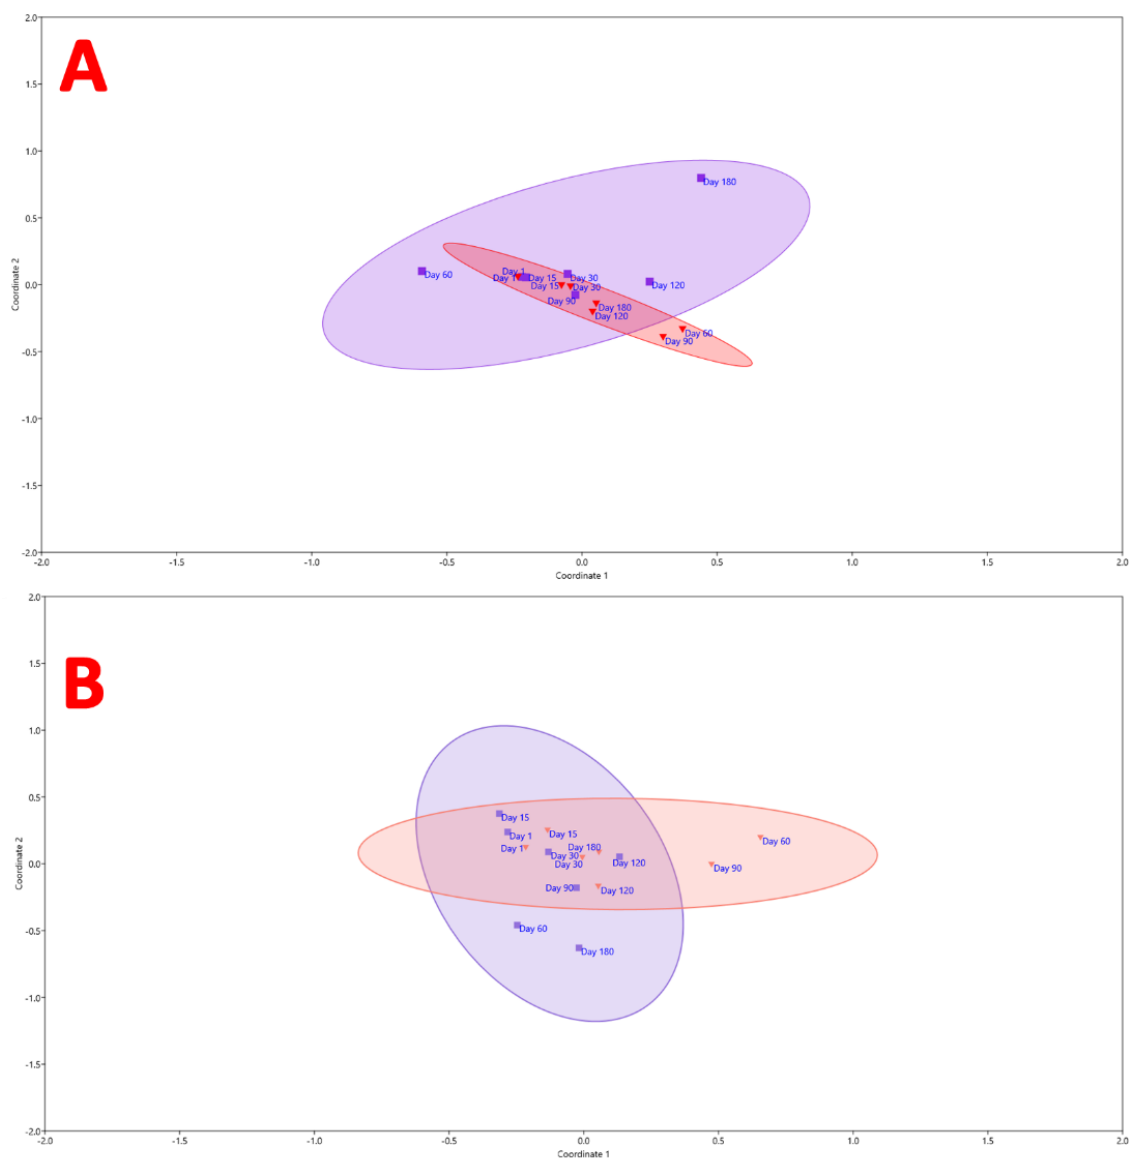

**Figure S5.** Principal coordinate analysis of total community (A); and metabolically active community (B) for control bioreactor (red) and amended bioreactor (purple).

**Table S1.** (A) Primers used for quantification of total Bacteria, total Archaea, total Fungi through RT-qPCR and qPCR. (B) qPCR conditions for the amplification and quantification of interest genes.

| <b>A</b>                      |                   |                                                         |                                                           |                     |
|-------------------------------|-------------------|---------------------------------------------------------|-----------------------------------------------------------|---------------------|
| Group                         | Gene Marker       | Primers                                                 | Sequence (5'-3')                                          | References          |
| Total Bacteria                | V3-16S rRNA       | P1 (341F)<br>P2 (534R)                                  | CCTACGGGAGGCAGCAG<br>ATTACCGCGGCTGCTGG                    | Muyzer et al., 1993 |
| Total Archaea                 | 16S rRNA          | ARCH915 (F)                                             | AGGAATTGGCGGGGAG-CAC<br>UNI-b-rev (R) GAC-GGGCGGTGTGTRCAA | Yu et al., 2008     |
| Fungi                         | 18S rRNA          | Fungi-QuantF<br>Fungi-QuantR                            | GGRAAACTCACCAG-GAGGTCCAG<br>GSWCTATCCCCAKCACGA            | Liu et al., 2012    |
| <b>B</b>                      |                   |                                                         |                                                           |                     |
|                               |                   | Total Bacteria                                          | Total Archaea                                             | Total Fungi         |
| Initial denaturalization      |                   | 95 °C, 7 min                                            | 95 °C, 7 min                                              | 95 °C, 3 min        |
| Amplification<br>(×40 cycles) | Denaturalization  | 95 °C, 30 s                                             | 95 °C, 30 s                                               | 94 °C, 30 s         |
|                               | Primers annealing | 60 °C, 30 s                                             | 60 °C, 30 s                                               | 62 °C, 30 s         |
|                               | Elongation        | 72 °C, 30 s                                             | 72 °C, 30 s                                               | 62 °C, 45 s         |
|                               | Melting curve     | 60 °C-95 °C + 2 °C/min. Fluorescence measured each 15 s |                                                           |                     |

**Table S2.** α-diversity analysis calculated through, Shannon Wiener and Simpson indices for RNA and DNA biological samples for both reactors.

|         |         | DNA     |         | RNA     |         |
|---------|---------|---------|---------|---------|---------|
| Reactor |         | Simpson | Shannon | Simpson | Shannon |
| CB      | Day 1   | 0.921   | 3.712   | 0.910   | 2.902   |
|         | Day 15  | 0.952   | 4.132   | 0.927   | 3.001   |
|         | Day 30  | 0.951   | 4.131   | 0.929   | 3.087   |
|         | Day 60  | 0.967   | 4.488   | 0.945   | 3.229   |
|         | Day 90  | 0.960   | 4.210   | 0.940   | 3.179   |
|         | Day 120 | 0.955   | 4.082   | 0.928   | 3.004   |
|         | Day 180 | 0.959   | 4.420   | 0.926   | 3.065   |
| PB      | Day 1   | 0.916   | 3.674   | 0.869   | 2.574   |
|         | Day 15  | 0.920   | 3.784   | 0.894   | 2.853   |
|         | Day 30  | 0.958   | 4.195   | 0.937   | 3.173   |
|         | Day 60  | 0.905   | 3.775   | 0.893   | 2.687   |
|         | Day 90  | 0.946   | 3.924   | 0.927   | 3.002   |
|         | Day 120 | 0.972   | 4.578   | 0.946   | 3.286   |
|         | Day 180 | 0.966   | 4.208   | 0.932   | 3.192   |

**Table S3.** One way PERMANOVA analysis among control and pharmaceutical bioreactors.

| <b>rRNA</b>        | <b>Otu01</b>             | <b>Otu02</b>            | <b>Otu03</b>          | <b>Otu04</b>             | <b>Otu05</b>              | <b>Otu06</b>          | <b>Otu07</b> | <b>Otu08</b> | <b>Otu09</b> | <b>Otu10</b> |
|--------------------|--------------------------|-------------------------|-----------------------|--------------------------|---------------------------|-----------------------|--------------|--------------|--------------|--------------|
| <b>F</b>           | 2.223                    | 0.2388                  | 0.6864                | 6.962                    | 4.208                     | 10.11                 | 1.028        | 3.065        | 1.3          | 2.791        |
| <b>q</b>           | 0.140                    | 0.776                   | 0.464                 | 0.009                    | 0.0502                    | 0.006                 | 0.379        | 0.046        | 0.228        | 0.087        |
| <b>rDNA</b>        | <b>Otu01</b>             | <b>Otu02</b>            | <b>Otu03</b>          | <b>Otu04</b>             | <b>Otu05</b>              | <b>Otu06</b>          | <b>Otu07</b> | <b>Otu08</b> | <b>Otu09</b> | <b>Otu10</b> |
| <b>F</b>           | 1.714                    | 0.3033                  | 0.6197                | 3.866                    | 2.185                     | 3.619                 | 0.964        | 1.322        | 1.761        | 2.791        |
| <b>q</b>           | 0.198                    | 0.733                   | 0.494                 | 0.020                    | 0.084                     | 0.014                 | 0.419        | 0.266        | 0.142        | 0.085        |
| <b>Performance</b> | <b>BOD Rem (%)</b>       | <b>COD Rem (%)</b>      | <b>Mean Size</b>      | <b>Settling velo</b>     | <b>MLSS</b>               | <b>TN Rem (%)</b>     |              |              |              |              |
| <b>F</b>           | 8.269                    | 7.74                    | 5.892                 | 6.845                    | 0.347                     | 7.191                 |              |              |              |              |
| <b>q</b>           | 0.008                    | 0.014                   | 0.036                 | 0.024                    | 0.583                     | 0.006                 |              |              |              |              |
| <b>qPCR</b>        | <b>16S rDNA Bacteria</b> | <b>16S rDNA Archaea</b> | <b>18S rDNA Fungi</b> | <b>16S rRNA Bacteria</b> | <b>16S rRNA Ar- chaea</b> | <b>18S rRNA Fungi</b> |              |              |              |              |
| <b>F</b>           | 1.199                    | 0.525                   | 0.359                 | 0.731                    | 2.163                     | 4.25                  |              |              |              |              |
| <b>q</b>           | 0.354                    | 0.653                   | 0.828                 | 0.551                    | 0.177                     | 0.025                 |              |              |              |              |
